# Supplementary material for: Screening of a Small Number of Italian COVID-19 Syndrome Survivors by Means of the Fatigue Assessment Scale: Long COVID Prevalence and the Role of Gender
Source: MDPI journal article supplement (doi:10.3390/covid1030044), 2021-10-29
Supplement: s1 [file s1]

**Table S1.** data from 1st questionnaire.

| Patient<br>N | ANSWERS TO QUESTIONS |   |   |   |   |   |   |   |   |    | AGE<br>[yrs] | BMI  | SEX | CARE | SMOKE |
|--------------|----------------------|---|---|---|---|---|---|---|---|----|--------------|------|-----|------|-------|
|              | 1                    | 2 | 3 | 4 | 5 | 6 | 7 | 8 | 9 | 10 |              |      |     |      |       |
| 1            | 3                    | 4 | 2 | 2 | 1 | 2 | 2 | 2 | 2 | 2  | 46           | 27.7 | M   | hpt  | NO    |
| 2            | 2                    | 4 | 1 | 3 | 2 | 2 | 2 | 1 | 2 | 3  | 53           | 22.9 | F   | hpt  | EX    |
| 3            | 2                    | 4 | 5 | 3 | 1 | 1 | 1 | 2 | 1 | 5  | 68           | 27.7 | M   | hpt  | EX    |
| 4            | 2                    | 4 | 3 | 4 | 4 | 4 | 2 | 4 | 2 | 5  | 72           | 23   | M   | hpt  | EX    |
| 5            | 4                    | 4 | 3 | 2 | 3 | 2 | 1 | 2 | 2 | 3  | 53           | 22.2 | M   | hpt  | EX    |
| 6            | 3                    | 2 | 2 | 4 | 1 | 2 | 1 | 1 | 4 | 1  | 65           | 26.9 | M   | hpt  | EX    |
| 7            | 4                    | 5 | 5 | 1 | 5 | 5 | 3 | 2 | 4 | 5  | 68           | ---  | M   | home | NO    |
| 8            | 4                    | 5 | 2 | 1 | 4 | 2 | 4 | 4 | 3 | 3  | 51           | 25.2 | F   | home | EX    |
| 9            | 1                    | 2 | 3 | 5 | 1 | 2 | 1 | 3 | 1 | 5  | 76           | 22.9 | M   | hpt  | NO    |
| 10           | 5                    | 5 | 5 | 2 | 5 | 5 | 2 | 5 | 5 | 2  | 56           | 20.6 | F   | home | NO    |
| 11           | 2                    | 4 | 2 | 1 | 4 | 3 | 4 | 1 | 5 | 5  | 56           | 28.5 | F   | home | NO    |
| 12           | 4                    | 5 | 4 | 2 | 5 | 2 | 2 | 2 | 4 | 2  | 61           | 32.7 | F   | hpt  | EX    |
| 13           | 4                    | 4 | 2 | 2 | 2 | 2 | 2 | 2 | 4 | 2  | 61           | 32.7 | F   | home | EX    |
| 14           | 5                    | 5 | 5 | 1 | 5 | 5 | 4 | 4 | 5 | 2  | 64           | 28.9 | F   | home | EX    |
| 15           | 3                    | 2 | 3 | 2 | 4 | 2 | 3 | 2 | 4 | 2  | 72           | ---  | M   | hpt  | EX    |
| 16           | 4                    | 2 | 2 | 4 | 3 | 1 | 1 | 2 | 3 | 5  | 48           | 24.7 | M   | home | NO    |
| 17           | 5                    | 5 | 5 | 2 | 5 | 5 | 4 | 5 | 4 | 3  | 67           | 34.5 | F   | home | NO    |
| 18           | 5                    | 5 | 5 | 1 | 5 | 5 | 1 | 5 | 5 | 1  | 37           | ---  | F   | hpt  | NO    |
| 19           | 2                    | 1 | 1 | 5 | 2 | 1 | 1 | 1 | 4 | 4  | 64           | 30.4 | M   | hpt  | NO    |
| 20           | 2                    | 2 | 2 | 3 | 4 | 1 | 1 | 1 | 1 | 4  | 49           | 33.5 | M   | hpt  | EX    |
| 21           | 2                    | 2 | 1 | 2 | 1 | 1 | 1 | 3 | 2 | 4  | 51           | 25.4 | M   | home | NO    |
| 22           | 4                    | 3 | 5 | 2 | 4 | 5 | 4 | 5 | 5 | 4  | 61           | 39.3 | F   | hpt  | EX    |
| 23           | 4                    | 4 | 4 | 3 | 2 | 1 | 2 | 1 | 2 | 5  | 63           | 30.7 | M   | hpt  | EX    |

hpt = hospitalized patient      home = home care

EX = previous smoker      NO = no smoker

**Table S2.** FAS score summary for the 1<sup>st</sup> questionnaire.

|     |                  |               |                  |                  |                  |
|-----|------------------|---------------|------------------|------------------|------------------|
| ALL | M(30), SD(10)    |               |                  |                  |                  |
| M   | M(23.9), SD(6.5) | Hospitalized  | M(26.9), SD(9.0) | Previous smokers | M(29.7), SD(8.0) |
| F   | M(37.9), SD(8.4) | Home confined | M(34.8), SD(9.7) | No smokers       | M(30), SD(12)    |

**Table S3:** 1<sup>st</sup> questionnaire - score for each question (questions 4 and 10 are reverse scored)

| N  | Question                                                  | TOT             | M               | F               |
|----|-----------------------------------------------------------|-----------------|-----------------|-----------------|
| 1  | I am bothered by fatigue                                  | M(3.3), SD(1.2) | M(2.8), SD(1.0) | M(4.0), SD(1.2) |
| 2  | I get tired very quickly                                  | M(3.6), SD(1.3) | M(2.9), SD(1.3) | M(4.5), SD(0.7) |
| 3  | I don't do much during the day                            | M(3.1), SD(1.5) | M(2.8), SD(1.3) | M(3.6), SD(1.6) |
| 4  | I have enough energy for everyday life                    | M(3.5), SD(1.2) | M(2.9), SD(1.3) | M(4.3), SD(0.7) |
| 5  | Physically, I feel exhausted                              | M(3.2), SD(1.6) | M(2.5), SD(1.5) | M(4.1), SD(1.2) |
| 6  | I have problems starting things                           | M(2.7), SD(1.6) | M(1.9), SD(1.3) | M(3.6), SD(1.5) |
| 7  | I have problems thinking clearly                          | M(2.1), SD(1.2) | M(1.5), SD(0.8) | M(2.9), SD(1.2) |
| 8  | I feel no desire to do anything                           | M(2.6), SD(1.5) | M(2.0), SD(0.9) | M(3.4), SD(1.7) |
| 9  | Mentally, I feel exhausted                                | M(3.2), SD(1.4) | M(2.5), SD(1.2) | M(4.2), SD(1.0) |
| 10 | When I am doing something, I can concentrate very quickly | M(2.7), SD(1.4) | M(2.2), SD(1.4) | M(3.3), SD(1.2) |

**Table S4** data from 2nd questionnaire

| Patient<br>N | ANSWERS TO QUESTIONS |   |   |   |   |   |   |   |   |    |
|--------------|----------------------|---|---|---|---|---|---|---|---|----|
|              | 1                    | 2 | 3 | 4 | 5 | 6 | 7 | 8 | 9 | 10 |
| 1            | 1                    | 1 | 1 | 5 | 1 | 1 | 1 | 1 | 1 | 1  |
| 2            | 2                    | 4 | 1 | 5 | 4 | 2 | 3 | 1 | 4 | 2  |
| 3            | 1                    | 1 | 3 | 3 | 2 | 1 | 1 | 1 | 1 | 1  |
| 4            | 1                    | 2 | 2 | 2 | 2 | 3 | 2 | 2 | 3 | 1  |
| 5            | 1                    | 1 | 1 | 5 | 1 | 1 | 1 | 1 | 1 | 1  |
| 6            | 1                    | 1 | 1 | 5 | 1 | 1 | 1 | 1 | 1 | 1  |
| 7            | 2                    | 4 | 3 | 2 | 2 | 2 | 3 | 2 | 2 | 2  |
| 8            | 2                    | 2 | 1 | 4 | 2 | 1 | 2 | 2 | 2 | 2  |
| 9            | 1                    | 1 | 1 | 5 | 1 | 1 | 1 | 1 | 1 | 1  |
| 10           | 1                    | 1 | 1 | 5 | 1 | 1 | 1 | 1 | 1 | 1  |
| 11           | 3                    | 3 | 3 | 1 | 2 | 2 | 1 | 2 | 2 | 3  |
| 12           | 4                    | 5 | 5 | 1 | 5 | 4 | 5 | 3 | 2 | 4  |
| 13           | 1                    | 1 | 1 | 4 | 1 | 1 | 1 | 1 | 1 | 1  |
| 14           | 5                    | 5 | 5 | 1 | 5 | 5 | 4 | 5 | 5 | 5  |
| 15           | 1                    | 2 | 3 | 5 | 1 | 4 | 2 | 1 | 2 | 1  |
| 16           | 1                    | 2 | 1 | 5 | 1 | 1 | 1 | 1 | 2 | 1  |
| 17           | 5                    | 5 | 5 | 1 | 5 | 5 | 5 | 5 | 5 | 5  |
| 18           | 2                    | 3 | 3 | 2 | 3 | 3 | 1 | 2 | 5 | 2  |
| 19           | 1                    | 1 | 2 | 3 | 1 | 1 | 1 | 1 | 1 | 1  |
| 20           | 1                    | 1 | 1 | 4 | 1 | 1 | 2 | 1 | 2 | 1  |
| 21           | 1                    | 1 | 1 | 5 | 1 | 1 | 1 | 1 | 1 | 1  |
| 22           | 1                    | 1 | 1 | 3 | 2 | 1 | 1 | 1 | 1 | 1  |
| 23           | 1                    | 1 | 1 | 5 | 1 | 1 | 1 | 1 | 1 | 1  |

**Table S5:** FAS score summary for the 2<sup>nd</sup> questionnaire

|     |                  |               |                  |                  |               |
|-----|------------------|---------------|------------------|------------------|---------------|
| ALL | M(20), SD(12)    |               |                  |                  |               |
| M   | M(14.4), SD(5.4) | Hospitalized  | M(17.6), SD(9.5) | Previous smokers | M(20), SD(12) |
| F   | M(27), SD(15)    | Home confined | M(24), SD(16)    | No smokers       | M(20), SD(13) |

**Table S6:** 2nd questionnaire - score for each question (questions 4 and 10 are reverse scored)

| N  | Question                                                  | TOT             | M               | F               |
|----|-----------------------------------------------------------|-----------------|-----------------|-----------------|
| 1  | I am bothered by fatigue                                  | M(1.7), SD(1.3) | M(1.1), SD(0.3) | M(2.6), SD(1.6) |
| 2  | I get tired very quickly                                  | M(2.1), SD(1.5) | M(1.5), SD(0.9) | M(3.0), SD(1.7) |
| 3  | I don't do much during the day                            | M(2.0), SD(1.4) | M(1.6), SD(0.9) | M(2.6), SD(1.8) |
| 4  | I have enough energy for everyday life                    | M(2.5), SD(1.6) | M(1.8), SD(1.2) | M(3.3), SD(1.7) |
| 5  | Physically, I feel exhausted                              | M(2.0), SD(1.4) | M(1.2), SD(0.4) | M(3.0), SD(1.6) |
| 6  | I have problems starting things                           | M(1.9), SD(1.4) | M(1.5), SD(1.0) | M(2.5), SD(1.6) |
| 7  | I have problems thinking clearly                          | M(1.8), SD(1.3) | M(1.4), SD(0.7) | M(2.4), SD(1.7) |
| 8  | I feel no desire to do anything                           | M(1.7), SD(1.2) | M(1.2), SD(0.4) | M(2.3), SD(1.6) |
| 9  | Mentally, I feel exhausted                                | M(2.0), SD(1.4) | M(1.5), SD(0.7) | M(2.8), SD(1.8) |
| 10 | When I am doing something, I can concentrate very quickly | M(2.2), SD(1.4) | M(1.7), SD(1.1) | M(2.8), SD(1.5) |
